# Supplementary material
Source: publisher figshare collection journal article supplement (https://acs.figshare.com/ndownloader/files/5760546)
Supplement: Supplementary file 1 [file 5760546]

# ja9815374.cif

data_general 
 
_publ_contact_author 
; 
    Prof. Charles P. Casey 
    Department of Chemistry 
    University of Wisconsin 
    Madison, WI  53706-1396  USA 
; 
_publ_contact_author_email      casey@chem.wisc.edu 
_publ_contact_author_fax        1(608)2620381 
_publ_contact_author_phone      1(608)2620584 

_publ_requested_journal       
  'Journal of the American Chemical Society'  


loop_ 
    _publ_author_name 
    _publ_author_address 
 
  'Charles P. Casey' 
;  Department of Chemistry 
   University of Wisconsin 
   1101 University Ave. 
   Madison, WI  53706-1396  USA 
; 
  'John T. Brady' 
;  Department of Chemistry 
   University of Wisconsin 
   1101 University Ave. 
   Madison, WI  53706-1396  USA 
; 
  'Timothy M. Boller' 
;  Department of Chemistry 
   University of Wisconsin 
   1101 University Ave. 
   Madison, WI  53706-1396  USA 
; 
  'Frank Weinhold' 
;  Department of Chemistry 
   University of Wisconsin 
   1101 University Ave. 
   Madison, WI  53706-1396  USA 
; 
  'Randy K. Hayashi' 
;  Department of Chemistry 
   University of Wisconsin 
   1101 University Ave. 
   Madison, WI  53706-1396  USA 
; 
 
_publ_section_title 
; 
 Protonation of Rhenium Alkyne Complexes Produces 
 3-Allyl Rhenium Complexes via Observable 1-Metallacyclopropene 
 Intermediates.
; 
#====================
 
data_compound_12 
 
_audit_creation_method            SHELXL 
_chemical_name_systematic 
; 
 ? 
; 
_chemical_name_common             ? 
_chemical_formula_moiety          ? 
_chemical_formula_structural      ? 
_chemical_formula_analytical      ? 
_chemical_formula_sum             'C26 H26 B F4 O2 Re' 
_chemical_formula_weight          643.48 
_chemical_melting_point           ? 
_chemical_compound_source         ? 
 
loop_ 
 _atom_type_symbol 
 _atom_type_description 
 _atom_type_scat_dispersion_real 
 _atom_type_scat_dispersion_imag 
 _atom_type_scat_source 
 'C'  'C'   0.0033   0.0016 
 'International Tables Vol C Tables 4.2.6.8 and 6.1.1.4' 
 'H'  'H'   0.0000   0.0000 
 'International Tables Vol C Tables 4.2.6.8 and 6.1.1.4' 
 'B'  'B'   0.0013   0.0007 
 'International Tables Vol C Tables 4.2.6.8 and 6.1.1.4' 
 'O'  'O'   0.0106   0.0060 
 'International Tables Vol C Tables 4.2.6.8 and 6.1.1.4' 
 'F'  'F'   0.0171   0.0103 
 'International Tables Vol C Tables 4.2.6.8 and 6.1.1.4' 
 'Re'  'Re'  -1.0185   7.2310 
 'International Tables Vol C Tables 4.2.6.8 and 6.1.1.4' 
 
_symmetry_cell_setting            monoclinic 
_symmetry_space_group_name_H-M    'C 1 c 1' 
 
loop_ 
 _symmetry_equiv_pos_as_xyz 
 'x, y, z' 
 'x, -y, z+1/2' 
 'x+1/2, y+1/2, z' 
 'x+1/2, -y+1/2, z+1/2' 
 
_cell_length_a                    15.1677(3) 
_cell_length_b                    11.5677(3) 
_cell_length_c                    14.4477(3) 
_cell_angle_alpha                 90.00 
_cell_angle_beta                  101.055(2) 
_cell_angle_gamma                 90.00 
_cell_volume                      2487.89(10) 
_cell_formula_units_Z             4 
_cell_measurement_temperature     138(2) 
_cell_measurement_reflns_used     5050 
_cell_measurement_theta_min       3.0 
_cell_measurement_theta_max       25.0 
 
_exptl_crystal_description        prism 
_exptl_crystal_colour             gray 
_exptl_crystal_size_max           0.20 
_exptl_crystal_size_mid           0.10 
_exptl_crystal_size_min           0.10 
_exptl_crystal_density_diffrn     1.718 
_exptl_crystal_density_method     'not measured' 
_exptl_crystal_F_000              1256 
_exptl_absorpt_coefficient_mu     4.935 
_exptl_absorpt_correction_type    empirical 
_exptl_absorpt_correction_T_min   0.686 
_exptl_absorpt_correction_T_max   0.928 
 
_exptl_special_details 
; 
 ? 
; 
 
_diffrn_ambient_temperature       138(2) 
_diffrn_radiation_wavelength      0.71073 
_diffrn_radiation_type            MoK\a 
_diffrn_radiation_source          'sealed tube' 
_diffrn_radiation_monochromator   graphite 
_diffrn_measurement_device        'Siemens P4/CCD' 
_diffrn_measurement_method        'phi scan frames' 
_diffrn_standards_number          174 
_diffrn_standards_interval_count  ? 
_diffrn_standards_interval_time   ? 
_diffrn_standards_decay_%         0.01 
_diffrn_reflns_number             5261 
_diffrn_reflns_av_R_equivalents   0.0188 
_diffrn_reflns_av_sigmaI/netI     0.0590 
_diffrn_reflns_limit_h_min        -19 
_diffrn_reflns_limit_h_max        18 
_diffrn_reflns_limit_k_min        -14 
_diffrn_reflns_limit_k_max        4 
_diffrn_reflns_limit_l_min        -17 
_diffrn_reflns_limit_l_max        19 
_diffrn_reflns_theta_min          2.23 
_diffrn_reflns_theta_max          28.25 
_reflns_number_total              4544 
_reflns_number_observed           4217 
_reflns_observed_criterion        >2sigma(I) 
 
_computing_data_collection        ? 
_computing_cell_refinement        ? 
_computing_data_reduction         ? 
_computing_structure_solution     'SHELXS-86 (Sheldrick, 1990)' 
_computing_structure_refinement   'SHELXL-93 (Sheldrick, 1993)' 
_computing_molecular_graphics     ? 
_computing_publication_material   ? 
 
_refine_special_details 
; 
 Refinement on F^2^ for ALL reflections except for 0 with very negative F^2^ 
 or flagged by the user for potential systematic errors.  Weighted R-factors 
 wR and all goodnesses of fit S are based on F^2^, conventional R-factors R 
 are based on F, with F set to zero for negative F^2^. The observed criterion 
 of F^2^ > 2sigma(F^2^) is used only for calculating _R_factor_obs etc. and is 
 not relevant to the choice of reflections for refinement.  R-factors based 
 on F^2^ are statistically about twice as large as those based on F, and R- 
 factors based on ALL data will be even larger. 
; 
 
_refine_ls_structure_factor_coef  Fsqd  
_refine_ls_matrix_type            full 
_refine_ls_weighting_scheme 
 'calc w=1/[\s^2^(Fo^2^)+(0.0162P)^2^+0.0000P] where P=(Fo^2^+2Fc^2^)/3' 
_atom_sites_solution_primary      direct 
_atom_sites_solution_secondary    difmap 
_atom_sites_solution_hydrogens    geom 
_refine_ls_hydrogen_treatment     riding 
_refine_ls_extinction_method      none 
_refine_ls_extinction_coef        ? 
_refine_ls_abs_structure_details 
 'Flack H D (1983), Acta Cryst. A39, 876-881' 
_refine_ls_abs_structure_Flack    0.051(10) 
_refine_ls_number_reflns          4544 
_refine_ls_number_parameters      307 
_refine_ls_number_restraints      2 
_refine_ls_R_factor_all           0.0308 
_refine_ls_R_factor_obs           0.0287 
_refine_ls_wR_factor_all          0.0712 
_refine_ls_wR_factor_obs          0.0705 
_refine_ls_goodness_of_fit_all    1.060 
_refine_ls_goodness_of_fit_obs    1.093 
_refine_ls_restrained_S_all       1.060 
_refine_ls_restrained_S_obs       1.093 
_refine_ls_shift/esd_max          -0.011 
_refine_ls_shift/esd_mean         0.001 
 
loop_ 
 _atom_site_label 
 _atom_site_type_symbol 
 _atom_site_fract_x 
 _atom_site_fract_y 
 _atom_site_fract_z 
 _atom_site_U_iso_or_equiv 
 _atom_site_thermal_displace_type 
 _atom_site_occupancy 
 _atom_site_calc_flag 
 _atom_site_refinement_flags 
 _atom_site_disorder_group 
Re1 Re 0.50046(2) 0.342905(15) 0.25293(2) 0.01684(7) Uani 1 d . . 
C1 C 0.5358(5) 0.2901(7) 0.3855(6) 0.019(2) Uani 1 d . . 
C2 C 0.6183(5) 0.2688(7) 0.3549(6) 0.016(2) Uani 1 d . . 
H2 H 0.6294(5) 0.1852(7) 0.3439(6) 0.019 Uiso 1 calc R . 
C3 C 0.7025(5) 0.3357(6) 0.3937(5) 0.0228(15) Uani 1 d . . 
C4 C 0.7023(6) 0.4320(9) 0.4496(8) 0.038(3) Uani 1 d . . 
H4 H 0.6469(6) 0.4567(9) 0.4644(8) 0.046 Uiso 1 calc R . 
C5 C 0.7802(5) 0.4953(7) 0.4858(6) 0.039(2) Uani 1 d . . 
H5 H 0.7774(5) 0.5623(7) 0.5232(6) 0.047 Uiso 1 calc R . 
C6 C 0.8605(5) 0.4583(8) 0.4658(6) 0.039(2) Uani 1 d . . 
H6 H 0.9142(5) 0.4995(8) 0.4897(6) 0.047 Uiso 1 calc R . 
C7 C 0.8632(5) 0.3618(7) 0.4113(6) 0.035(2) Uani 1 d . . 
H7 H 0.9192(5) 0.3373(7) 0.3977(6) 0.042 Uiso 1 calc R . 
C8 C 0.7855(5) 0.2983(7) 0.3754(5) 0.027(2) Uani 1 d . . 
H8 H 0.7889(5) 0.2307(7) 0.3389(5) 0.032 Uiso 1 calc R . 
C9 C 0.5071(4) 0.2690(6) 0.4713(5) 0.0209(14) Uani 1 d . . 
C10 C 0.4188(4) 0.2924(6) 0.4861(5) 0.0209(14) Uani 1 d . . 
H10 H 0.3744(4) 0.3201(6) 0.4355(5) 0.025 Uiso 1 calc R . 
C11 C 0.3973(5) 0.2752(6) 0.5737(5) 0.0224(14) Uani 1 d . . 
H11 H 0.3381(5) 0.2912(6) 0.5825(5) 0.027 Uiso 1 calc R . 
C12 C 0.4609(5) 0.2347(6) 0.6495(5) 0.0237(15) Uani 1 d . . 
H12 H 0.4452(5) 0.2253(6) 0.7096(5) 0.028 Uiso 1 calc R . 
C13 C 0.5481(5) 0.2080(6) 0.6369(5) 0.0255(15) Uani 1 d . . 
H13 H 0.5912(5) 0.1799(6) 0.6885(5) 0.031 Uiso 1 calc R . 
C14 C 0.5708(5) 0.2221(5) 0.5516(5) 0.0218(14) Uani 1 d . . 
H14 H 0.6294(5) 0.2012(5) 0.5436(5) 0.026 Uiso 1 calc R . 
C15 C 0.5861(7) 0.4671(9) 0.2333(8) 0.034(3) Uani 1 d . . 
O1 O 0.6384(5) 0.5308(6) 0.2199(6) 0.056(2) Uani 1 d . . 
C16 C 0.4292(7) 0.4575(9) 0.3009(7) 0.028(2) Uani 1 d . . 
O2 O 0.3847(5) 0.5288(5) 0.3262(4) 0.035(2) Uani 1 d . . 
C17 C 0.5186(5) 0.2008(6) 0.1450(5) 0.0219(14) Uani 1 d . . 
C18 C 0.4854(6) 0.3008(7) 0.0930(6) 0.023(2) Uani 1 d . . 
C19 C 0.3989(5) 0.3291(6) 0.1123(5) 0.023(2) Uani 1 d . . 
C20 C 0.3777(6) 0.2439(7) 0.1789(6) 0.018(2) Uani 1 d . . 
C21 C 0.4510(5) 0.1641(5) 0.1968(5) 0.0207(14) Uani 1 d . . 
C22 C 0.6015(6) 0.1341(7) 0.1369(6) 0.036(2) Uani 1 d . . 
H22A H 0.6084(6) 0.0689(7) 0.1810(6) 0.054 Uiso 1 calc R . 
H22B H 0.6540(6) 0.1848(7) 0.1521(6) 0.054 Uiso 1 calc R . 
H22C H 0.5961(6) 0.1050(7) 0.0724(6) 0.054 Uiso 1 calc R . 
C23 C 0.5313(6) 0.3654(7) 0.0231(6) 0.037(2) Uani 1 d . . 
H23A H 0.4942(6) 0.4315(7) -0.0028(6) 0.055 Uiso 1 calc R . 
H23B H 0.5388(6) 0.3132(7) -0.0282(6) 0.055 Uiso 1 calc R . 
H23C H 0.5903(6) 0.3929(7) 0.0555(6) 0.055 Uiso 1 calc R . 
C24 C 0.3346(6) 0.4216(7) 0.0665(6) 0.028(2) Uani 1 d . . 
H24A H 0.2805(6) 0.4208(7) 0.0944(6) 0.041 Uiso 1 calc R . 
H24B H 0.3179(6) 0.4066(7) -0.0013(6) 0.041 Uiso 1 calc R . 
H24C H 0.3636(6) 0.4975(7) 0.0769(6) 0.041 Uiso 1 calc R . 
C25 C 0.2895(5) 0.2303(7) 0.2104(5) 0.030(2) Uani 1 d . . 
H25A H 0.2510(5) 0.2969(7) 0.1890(5) 0.044 Uiso 1 calc R . 
H25B H 0.2999(5) 0.2258(7) 0.2794(5) 0.044 Uiso 1 calc R . 
H25C H 0.2599(5) 0.1594(7) 0.1833(5) 0.044 Uiso 1 calc R . 
C26 C 0.4526(5) 0.0545(6) 0.2526(5) 0.028(2) Uani 1 d . . 
H26A H 0.5101(5) 0.0150(6) 0.2547(5) 0.042 Uiso 1 calc R . 
H26B H 0.4034(5) 0.0041(6) 0.2226(5) 0.042 Uiso 1 calc R . 
H26C H 0.4452(5) 0.0729(6) 0.3169(5) 0.042 Uiso 1 calc R . 
B1 B 0.1498(5) 0.4026(8) 0.3952(6) 0.025(2) Uani 1 d . . 
F1 F 0.0751(3) 0.3331(4) 0.3643(3) 0.0361(11) Uani 1 d . . 
F2 F 0.1849(3) 0.4375(4) 0.3165(3) 0.0427(12) Uani 1 d . . 
F3 F 0.2140(3) 0.3393(4) 0.4564(4) 0.0497(15) Uani 1 d . . 
F4 F 0.1253(4) 0.4996(4) 0.4397(3) 0.0444(12) Uani 1 d . . 
 
loop_ 
 _atom_site_aniso_label 
 _atom_site_aniso_U_11 
 _atom_site_aniso_U_22 
 _atom_site_aniso_U_33 
 _atom_site_aniso_U_23 
 _atom_site_aniso_U_13 
 _atom_site_aniso_U_12 
Re1 0.01235(11) 0.01532(10) 0.02173(12) 0.0000(2) 0.00048(7) -0.0014(2) 
C1 0.012(4) 0.026(4) 0.019(5) -0.003(3) -0.001(3) -0.002(3) 
C2 0.015(4) 0.013(4) 0.021(5) 0.000(3) 0.002(3) 0.002(3) 
C3 0.014(3) 0.028(4) 0.024(4) -0.001(3) -0.003(3) 0.001(2) 
C4 0.013(5) 0.045(5) 0.058(7) -0.027(4) 0.010(4) -0.007(4) 
C5 0.028(4) 0.040(5) 0.045(5) -0.009(3) -0.001(4) -0.016(3) 
C6 0.015(4) 0.065(6) 0.033(5) 0.015(4) -0.007(3) -0.016(4) 
C7 0.013(4) 0.053(5) 0.039(5) 0.019(4) 0.005(3) 0.006(3) 
C8 0.016(4) 0.040(4) 0.026(4) 0.011(3) 0.007(3) 0.010(3) 
C9 0.011(3) 0.021(3) 0.027(4) -0.007(3) -0.004(3) -0.001(2) 
C10 0.013(3) 0.023(3) 0.024(4) -0.003(3) -0.002(3) 0.002(3) 
C11 0.016(3) 0.021(3) 0.029(4) 0.003(3) 0.002(3) 0.002(2) 
C12 0.025(4) 0.022(3) 0.023(4) 0.001(3) 0.002(3) -0.001(3) 
C13 0.022(4) 0.025(3) 0.026(4) 0.003(3) -0.004(3) 0.001(3) 
C14 0.016(3) 0.020(3) 0.028(4) 0.000(3) 0.000(3) 0.001(2) 
C15 0.023(5) 0.026(4) 0.047(7) 0.007(4) -0.010(4) -0.002(3) 
O1 0.032(4) 0.047(4) 0.077(6) 0.027(4) -0.016(4) -0.025(3) 
C16 0.028(5) 0.031(5) 0.021(5) -0.001(3) -0.006(4) 0.000(4) 
O2 0.035(4) 0.028(3) 0.038(4) -0.009(3) -0.004(3) 0.013(3) 
C17 0.020(4) 0.019(3) 0.026(4) 0.003(3) 0.002(3) 0.000(3) 
C18 0.030(5) 0.025(4) 0.015(5) -0.003(3) 0.009(3) -0.002(3) 
C19 0.022(4) 0.024(4) 0.018(4) -0.003(3) -0.011(3) -0.001(3) 
C20 0.011(4) 0.029(4) 0.013(4) -0.002(3) -0.005(3) -0.008(3) 
C21 0.026(4) 0.017(3) 0.018(3) -0.001(2) 0.001(3) -0.002(2) 
C22 0.030(5) 0.039(4) 0.041(5) -0.008(3) 0.012(4) 0.008(3) 
C23 0.032(5) 0.046(5) 0.035(5) 0.009(4) 0.014(4) -0.003(4) 
C24 0.027(5) 0.024(4) 0.027(4) 0.002(3) -0.008(4) -0.002(4) 
C25 0.019(4) 0.036(4) 0.033(4) 0.002(3) 0.003(3) -0.005(3) 
C26 0.029(4) 0.022(4) 0.030(4) 0.001(3) -0.003(3) 0.004(3) 
B1 0.015(4) 0.042(5) 0.017(4) -0.001(3) -0.002(3) 0.003(3) 
F1 0.021(2) 0.047(3) 0.038(3) 0.004(2) 0.001(2) -0.006(2) 
F2 0.034(3) 0.066(3) 0.031(3) 0.000(2) 0.013(2) -0.014(2) 
F3 0.021(3) 0.075(4) 0.048(3) 0.015(3) -0.007(2) 0.020(2) 
F4 0.061(3) 0.039(3) 0.032(3) -0.003(2) 0.006(2) 0.011(2) 
 
_geom_special_details 
; 
 All esds (except the esd in the dihedral angle between two l.s. planes) 
 are estimated using the full covariance matrix.  The cell esds are taken 
 into account individually in the estimation of esds in distances, angles 
 and torsion angles; correlations between esds in cell parameters are only 
 used when they are defined by crystal symmetry.  An approximate (isotropic) 
 treatment of cell esds is used for estimating esds involving l.s. planes. 
; 
 
loop_ 
 _geom_bond_atom_site_label_1 
 _geom_bond_atom_site_label_2 
 _geom_bond_distance 
 _geom_bond_site_symmetry_2 
 _geom_bond_publ_flag 
Re1 C16 1.922(11) . ? 
Re1 C1 1.984(8) . ? 
Re1 C15 1.993(11) . ? 
Re1 C2 2.256(8) . ? 
Re1 C20 2.271(8) . ? 
Re1 C21 2.295(6) . ? 
Re1 C19 2.308(7) . ? 
Re1 C17 2.318(7) . ? 
Re1 C18 2.329(8) . ? 
C1 C9 1.412(10) . ? 
C1 C2 1.427(11) . ? 
C2 C3 1.506(10) . ? 
C3 C4 1.376(11) . ? 
C3 C8 1.403(10) . ? 
C4 C5 1.404(11) . ? 
C5 C6 1.373(12) . ? 
C6 C7 1.371(12) . ? 
C7 C8 1.402(11) . ? 
C9 C10 1.421(9) . ? 
C9 C14 1.464(10) . ? 
C10 C11 1.381(9) . ? 
C11 C12 1.393(9) . ? 
C12 C13 1.403(10) . ? 
C13 C14 1.352(10) . ? 
C15 O1 1.126(12) . ? 
C16 O2 1.168(12) . ? 
C17 C18 1.418(11) . ? 
C17 C21 1.444(10) . ? 
C17 C22 1.499(10) . ? 
C18 C19 1.430(11) . ? 
C18 C23 1.528(11) . ? 
C19 C20 1.456(10) . ? 
C19 C24 1.512(10) . ? 
C20 C21 1.430(11) . ? 
C20 C25 1.502(11) . ? 
C21 C26 1.500(9) . ? 
B1 F4 1.379(9) . ? 
B1 F3 1.390(9) . ? 
B1 F1 1.392(9) . ? 
B1 F2 1.404(9) . ? 
 
loop_ 
 _geom_angle_atom_site_label_1 
 _geom_angle_atom_site_label_2 
 _geom_angle_atom_site_label_3 
 _geom_angle 
 _geom_angle_site_symmetry_1 
 _geom_angle_site_symmetry_3 
 _geom_angle_publ_flag 
C16 Re1 C1 86.0(4) . . ? 
C16 Re1 C15 88.9(3) . . ? 
C1 Re1 C15 107.3(4) . . ? 
C16 Re1 C2 117.2(4) . . ? 
C1 Re1 C2 38.7(3) . . ? 
C15 Re1 C2 84.9(4) . . ? 
C16 Re1 C20 92.9(4) . . ? 
C1 Re1 C20 110.2(3) . . ? 
C15 Re1 C20 142.6(4) . . ? 
C2 Re1 C20 126.2(3) . . ? 
C16 Re1 C21 125.5(4) . . ? 
C1 Re1 C21 94.2(3) . . ? 
C15 Re1 C21 141.0(4) . . ? 
C2 Re1 C21 93.0(3) . . ? 
C20 Re1 C21 36.5(3) . . ? 
C16 Re1 C19 92.2(3) . . ? 
C1 Re1 C19 147.1(3) . . ? 
C15 Re1 C19 105.5(4) . . ? 
C2 Re1 C19 149.3(3) . . ? 
C20 Re1 C19 37.1(2) . . ? 
C21 Re1 C19 60.6(2) . . ? 
C16 Re1 C17 151.5(3) . . ? 
C1 Re1 C17 112.7(3) . . ? 
C15 Re1 C17 104.5(4) . . ? 
C2 Re1 C17 89.4(3) . . ? 
C20 Re1 C17 61.2(3) . . ? 
C21 Re1 C17 36.5(2) . . ? 
C19 Re1 C17 60.2(2) . . ? 
C16 Re1 C18 123.2(4) . . ? 
C1 Re1 C18 148.3(3) . . ? 
C15 Re1 C18 87.3(4) . . ? 
C2 Re1 C18 118.9(3) . . ? 
C20 Re1 C18 60.8(3) . . ? 
C21 Re1 C18 59.8(3) . . ? 
C19 Re1 C18 35.9(3) . . ? 
C17 Re1 C18 35.5(3) . . ? 
C9 C1 C2 132.8(7) . . ? 
C9 C1 Re1 146.1(6) . . ? 
C2 C1 Re1 81.0(5) . . ? 
C1 C2 C3 121.8(7) . . ? 
C1 C2 Re1 60.3(4) . . ? 
C3 C2 Re1 123.8(5) . . ? 
C4 C3 C8 117.6(7) . . ? 
C4 C3 C2 122.5(7) . . ? 
C8 C3 C2 119.9(6) . . ? 
C3 C4 C5 123.0(8) . . ? 
C6 C5 C4 118.4(8) . . ? 
C7 C6 C5 120.0(7) . . ? 
C6 C7 C8 121.5(7) . . ? 
C7 C8 C3 119.3(7) . . ? 
C1 C9 C10 123.8(7) . . ? 
C1 C9 C14 119.4(6) . . ? 
C10 C9 C14 116.7(7) . . ? 
C11 C10 C9 120.3(6) . . ? 
C10 C11 C12 121.3(6) . . ? 
C11 C12 C13 120.0(6) . . ? 
C14 C13 C12 120.2(7) . . ? 
C13 C14 C9 121.4(6) . . ? 
O1 C15 Re1 174.6(10) . . ? 
O2 C16 Re1 177.1(9) . . ? 
C18 C17 C21 107.4(6) . . ? 
C18 C17 C22 126.7(7) . . ? 
C21 C17 C22 125.3(6) . . ? 
C18 C17 Re1 72.7(4) . . ? 
C21 C17 Re1 70.9(4) . . ? 
C22 C17 Re1 128.8(5) . . ? 
C17 C18 C19 109.2(7) . . ? 
C17 C18 C23 126.0(8) . . ? 
C19 C18 C23 124.7(7) . . ? 
C17 C18 Re1 71.8(4) . . ? 
C19 C18 Re1 71.2(4) . . ? 
C23 C18 Re1 125.7(6) . . ? 
C18 C19 C20 107.5(7) . . ? 
C18 C19 C24 128.0(7) . . ? 
C20 C19 C24 124.2(7) . . ? 
C18 C19 Re1 72.8(4) . . ? 
C20 C19 Re1 70.1(4) . . ? 
C24 C19 Re1 127.0(5) . . ? 
C21 C20 C19 107.1(7) . . ? 
C21 C20 C25 125.8(7) . . ? 
C19 C20 C25 126.4(7) . . ? 
C21 C20 Re1 72.7(4) . . ? 
C19 C20 Re1 72.9(4) . . ? 
C25 C20 Re1 127.5(6) . . ? 
C20 C21 C17 108.7(6) . . ? 
C20 C21 C26 125.0(7) . . ? 
C17 C21 C26 126.0(6) . . ? 
C20 C21 Re1 70.8(4) . . ? 
C17 C21 Re1 72.6(4) . . ? 
C26 C21 Re1 126.9(5) . . ? 
F4 B1 F3 110.5(6) . . ? 
F4 B1 F1 110.1(6) . . ? 
F3 B1 F1 109.2(7) . . ? 
F4 B1 F2 108.7(7) . . ? 
F3 B1 F2 109.8(6) . . ? 
F1 B1 F2 108.5(6) . . ? 
 
loop_ 
 _geom_torsion_atom_site_label_1 
 _geom_torsion_atom_site_label_2 
 _geom_torsion_atom_site_label_3 
 _geom_torsion_atom_site_label_4 
 _geom_torsion 
 _geom_torsion_site_symmetry_1 
 _geom_torsion_site_symmetry_2 
 _geom_torsion_site_symmetry_3 
 _geom_torsion_site_symmetry_4 
 _geom_torsion_publ_flag 
 C16 Re1 C1 C9 39.6(11) . . . . ? 
 C15 Re1 C1 C9 127.3(11) . . . . ? 
 C2 Re1 C1 C9 -175.3(14) . . . . ? 
 C20 Re1 C1 C9 -52.0(11) . . . . ? 
 C21 Re1 C1 C9 -85.7(11) . . . . ? 
 C19 Re1 C1 C9 -48.3(13) . . . . ? 
 C17 Re1 C1 C9 -118.2(10) . . . . ? 
 C18 Re1 C1 C9 -118.7(10) . . . . ? 
 C16 Re1 C1 C2 -145.1(5) . . . . ? 
 C15 Re1 C1 C2 -57.4(6) . . . . ? 
 C20 Re1 C1 C2 123.3(4) . . . . ? 
 C21 Re1 C1 C2 89.6(5) . . . . ? 
 C19 Re1 C1 C2 127.0(5) . . . . ? 
 C17 Re1 C1 C2 57.1(5) . . . . ? 
 C18 Re1 C1 C2 56.6(8) . . . . ? 
 C9 C1 C2 C3 -70.0(12) . . . . ? 
 Re1 C1 C2 C3 113.6(7) . . . . ? 
 C9 C1 C2 Re1 176.4(10) . . . . ? 
 C16 Re1 C2 C1 39.9(6) . . . . ? 
 C15 Re1 C2 C1 126.1(6) . . . . ? 
 C20 Re1 C2 C1 -76.6(5) . . . . ? 
 C21 Re1 C2 C1 -93.0(5) . . . . ? 
 C19 Re1 C2 C1 -121.9(6) . . . . ? 
 C17 Re1 C2 C1 -129.3(5) . . . . ? 
 C18 Re1 C2 C1 -149.9(4) . . . . ? 
 C16 Re1 C2 C3 -70.4(7) . . . . ? 
 C1 Re1 C2 C3 -110.4(8) . . . . ? 
 C15 Re1 C2 C3 15.7(7) . . . . ? 
 C20 Re1 C2 C3 173.1(6) . . . . ? 
 C21 Re1 C2 C3 156.7(6) . . . . ? 
 C19 Re1 C2 C3 127.8(7) . . . . ? 
 C17 Re1 C2 C3 120.4(6) . . . . ? 
 C18 Re1 C2 C3 99.7(6) . . . . ? 
 C1 C2 C3 C4 -10.0(13) . . . . ? 
 Re1 C2 C3 C4 63.4(10) . . . . ? 
 C1 C2 C3 C8 168.2(7) . . . . ? 
 Re1 C2 C3 C8 -118.5(6) . . . . ? 
 C8 C3 C4 C5 2.2(14) . . . . ? 
 C2 C3 C4 C5 -179.7(9) . . . . ? 
 C3 C4 C5 C6 -1.2(15) . . . . ? 
 C4 C5 C6 C7 0.3(13) . . . . ? 
 C5 C6 C7 C8 -0.4(12) . . . . ? 
 C6 C7 C8 C3 1.4(11) . . . . ? 
 C4 C3 C8 C7 -2.2(11) . . . . ? 
 C2 C3 C8 C7 179.6(7) . . . . ? 
 C2 C1 C9 C10 -176.9(8) . . . . ? 
 Re1 C1 C9 C10 -3.2(15) . . . . ? 
 C2 C1 C9 C14 4.3(13) . . . . ? 
 Re1 C1 C9 C14 178.0(8) . . . . ? 
 C1 C9 C10 C11 -176.5(7) . . . . ? 
 C14 C9 C10 C11 2.4(9) . . . . ? 
 C9 C10 C11 C12 0.0(10) . . . . ? 
 C10 C11 C12 C13 -1.6(10) . . . . ? 
 C11 C12 C13 C14 0.5(11) . . . . ? 
 C12 C13 C14 C9 2.1(10) . . . . ? 
 C1 C9 C14 C13 175.4(7) . . . . ? 
 C10 C9 C14 C13 -3.5(9) . . . . ? 
 C16 Re1 C15 O1 177.5(102) . . . . ? 
 C1 Re1 C15 O1 92.0(102) . . . . ? 
 C2 Re1 C15 O1 60.1(101) . . . . ? 
 C20 Re1 C15 O1 -89.2(101) . . . . ? 
 C21 Re1 C15 O1 -28.4(104) . . . . ? 
 C19 Re1 C15 O1 -90.5(101) . . . . ? 
 C17 Re1 C15 O1 -27.9(102) . . . . ? 
 C18 Re1 C15 O1 -59.3(101) . . . . ? 
 C1 Re1 C16 O2 -179.7(1000) . . . . ? 
 C15 Re1 C16 O2 73.0(184) . . . . ? 
 C2 Re1 C16 O2 156.6(182) . . . . ? 
 C20 Re1 C16 O2 -69.6(184) . . . . ? 
 C21 Re1 C16 O2 -87.4(184) . . . . ? 
 C19 Re1 C16 O2 -32.5(184) . . . . ? 
 C17 Re1 C16 O2 -46.5(188) . . . . ? 
 C18 Re1 C16 O2 -13.1(186) . . . . ? 
 C16 Re1 C17 C18 52.5(9) . . . . ? 
 C1 Re1 C17 C18 -179.6(5) . . . . ? 
 C15 Re1 C17 C18 -63.4(6) . . . . ? 
 C2 Re1 C17 C18 -147.9(5) . . . . ? 
 C20 Re1 C17 C18 79.2(5) . . . . ? 
 C21 Re1 C17 C18 116.1(6) . . . . ? 
 C19 Re1 C17 C18 36.4(5) . . . . ? 
 C16 Re1 C17 C21 -63.6(9) . . . . ? 
 C1 Re1 C17 C21 64.3(5) . . . . ? 
 C15 Re1 C17 C21 -179.5(5) . . . . ? 
 C2 Re1 C17 C21 96.0(4) . . . . ? 
 C20 Re1 C17 C21 -37.0(4) . . . . ? 
 C19 Re1 C17 C21 -79.7(4) . . . . ? 
 C18 Re1 C17 C21 -116.1(6) . . . . ? 
 C16 Re1 C17 C22 176.0(8) . . . . ? 
 C1 Re1 C17 C22 -56.1(7) . . . . ? 
 C15 Re1 C17 C22 60.1(7) . . . . ? 
 C2 Re1 C17 C22 -24.4(7) . . . . ? 
 C20 Re1 C17 C22 -157.4(7) . . . . ? 
 C21 Re1 C17 C22 -120.4(8) . . . . ? 
 C19 Re1 C17 C22 159.9(7) . . . . ? 
 C18 Re1 C17 C22 123.5(9) . . . . ? 
 C21 C17 C18 C19 1.0(9) . . . . ? 
 C22 C17 C18 C19 172.4(7) . . . . ? 
 Re1 C17 C18 C19 -61.8(5) . . . . ? 
 C21 C17 C18 C23 -175.9(8) . . . . ? 
 C22 C17 C18 C23 -4.5(13) . . . . ? 
 Re1 C17 C18 C23 121.3(9) . . . . ? 
 C21 C17 C18 Re1 62.8(5) . . . . ? 
 C22 C17 C18 Re1 -125.9(8) . . . . ? 
 C16 Re1 C18 C17 -153.1(5) . . . . ? 
 C1 Re1 C18 C17 0.8(8) . . . . ? 
 C15 Re1 C18 C17 120.0(5) . . . . ? 
 C2 Re1 C18 C17 37.3(5) . . . . ? 
 C20 Re1 C18 C17 -80.4(5) . . . . ? 
 C21 Re1 C18 C17 -38.1(4) . . . . ? 
 C19 Re1 C18 C17 -118.5(7) . . . . ? 
 C16 Re1 C18 C19 -34.6(6) . . . . ? 
 C1 Re1 C18 C19 119.3(7) . . . . ? 
 C15 Re1 C18 C19 -121.5(5) . . . . ? 
 C2 Re1 C18 C19 155.9(4) . . . . ? 
 C20 Re1 C18 C19 38.2(4) . . . . ? 
 C21 Re1 C18 C19 80.4(5) . . . . ? 
 C17 Re1 C18 C19 118.5(7) . . . . ? 
 C16 Re1 C18 C23 85.1(8) . . . . ? 
 C1 Re1 C18 C23 -121.0(7) . . . . ? 
 C15 Re1 C18 C23 -1.8(7) . . . . ? 
 C2 Re1 C18 C23 -84.4(8) . . . . ? 
 C20 Re1 C18 C23 157.9(8) . . . . ? 
 C21 Re1 C18 C23 -159.9(8) . . . . ? 
 C19 Re1 C18 C23 119.7(9) . . . . ? 
 C17 Re1 C18 C23 -121.8(9) . . . . ? 
 C17 C18 C19 C20 0.3(9) . . . . ? 
 C23 C18 C19 C20 177.2(8) . . . . ? 
 Re1 C18 C19 C20 -61.9(5) . . . . ? 
 C17 C18 C19 C24 -174.0(7) . . . . ? 
 C23 C18 C19 C24 3.0(13) . . . . ? 
 Re1 C18 C19 C24 123.9(7) . . . . ? 
 C17 C18 C19 Re1 62.1(6) . . . . ? 
 C23 C18 C19 Re1 -120.9(8) . . . . ? 
 C16 Re1 C19 C18 151.6(5) . . . . ? 
 C1 Re1 C19 C18 -122.3(6) . . . . ? 
 C15 Re1 C19 C18 62.1(5) . . . . ? 
 C2 Re1 C19 C18 -44.5(8) . . . . ? 
 C20 Re1 C19 C18 -116.5(7) . . . . ? 
 C21 Re1 C19 C18 -78.2(5) . . . . ? 
 C17 Re1 C19 C18 -36.0(4) . . . . ? 
 C16 Re1 C19 C20 -91.9(6) . . . . ? 
 C1 Re1 C19 C20 -5.8(8) . . . . ? 
 C15 Re1 C19 C20 178.6(6) . . . . ? 
 C2 Re1 C19 C20 72.0(6) . . . . ? 
 C21 Re1 C19 C20 38.3(5) . . . . ? 
 C17 Re1 C19 C20 80.5(5) . . . . ? 
 C18 Re1 C19 C20 116.5(7) . . . . ? 
 C16 Re1 C19 C24 26.6(8) . . . . ? 
 C1 Re1 C19 C24 112.6(8) . . . . ? 
 C15 Re1 C19 C24 -62.9(8) . . . . ? 
 C2 Re1 C19 C24 -169.6(6) . . . . ? 
 C20 Re1 C19 C24 118.4(9) . . . . ? 
 C21 Re1 C19 C24 156.8(8) . . . . ? 
 C17 Re1 C19 C24 -161.0(8) . . . . ? 
 C18 Re1 C19 C24 -125.0(9) . . . . ? 
 C18 C19 C20 C21 -1.4(8) . . . . ? 
 C24 C19 C20 C21 173.1(7) . . . . ? 
 Re1 C19 C20 C21 -65.1(5) . . . . ? 
 C18 C19 C20 C25 -172.0(8) . . . . ? 
 C24 C19 C20 C25 2.5(12) . . . . ? 
 Re1 C19 C20 C25 124.3(8) . . . . ? 
 C18 C19 C20 Re1 63.7(5) . . . . ? 
 C24 C19 C20 Re1 -121.8(7) . . . . ? 
 C16 Re1 C20 C21 -155.4(5) . . . . ? 
 C1 Re1 C20 C21 -68.6(5) . . . . ? 
 C15 Re1 C20 C21 112.6(7) . . . . ? 
 C2 Re1 C20 C21 -28.3(6) . . . . ? 
 C19 Re1 C20 C21 114.7(7) . . . . ? 
 C17 Re1 C20 C21 36.9(4) . . . . ? 
 C18 Re1 C20 C21 77.8(5) . . . . ? 
 C16 Re1 C20 C19 89.9(5) . . . . ? 
 C1 Re1 C20 C19 176.6(4) . . . . ? 
 C15 Re1 C20 C19 -2.1(9) . . . . ? 
 C2 Re1 C20 C19 -143.0(4) . . . . ? 
 C21 Re1 C20 C19 -114.7(7) . . . . ? 
 C17 Re1 C20 C19 -77.8(5) . . . . ? 
 C18 Re1 C20 C19 -37.0(4) . . . . ? 
 C16 Re1 C20 C25 -33.2(7) . . . . ? 
 C1 Re1 C20 C25 53.6(8) . . . . ? 
 C15 Re1 C20 C25 -125.2(8) . . . . ? 
 C2 Re1 C20 C25 93.9(8) . . . . ? 
 C21 Re1 C20 C25 122.2(9) . . . . ? 
 C19 Re1 C20 C25 -123.1(9) . . . . ? 
 C17 Re1 C20 C25 159.1(8) . . . . ? 
 C18 Re1 C20 C25 -160.0(8) . . . . ? 
 C19 C20 C21 C17 2.1(8) . . . . ? 
 C25 C20 C21 C17 172.7(7) . . . . ? 
 Re1 C20 C21 C17 -63.2(5) . . . . ? 
 C19 C20 C21 C26 -172.5(6) . . . . ? 
 C25 C20 C21 C26 -1.8(12) . . . . ? 
 Re1 C20 C21 C26 122.2(7) . . . . ? 
 C19 C20 C21 Re1 65.2(5) . . . . ? 
 C25 C20 C21 Re1 -124.1(8) . . . . ? 
 C18 C17 C21 C20 -1.9(8) . . . . ? 
 C22 C17 C21 C20 -173.4(7) . . . . ? 
 Re1 C17 C21 C20 62.0(5) . . . . ? 
 C18 C17 C21 C26 172.6(7) . . . . ? 
 C22 C17 C21 C26 1.1(11) . . . . ? 
 Re1 C17 C21 C26 -123.5(7) . . . . ? 
 C18 C17 C21 Re1 -63.9(5) . . . . ? 
 C22 C17 C21 Re1 124.6(7) . . . . ? 
 C16 Re1 C21 C20 30.7(6) . . . . ? 
 C1 Re1 C21 C20 118.8(5) . . . . ? 
 C15 Re1 C21 C20 -116.9(6) . . . . ? 
 C2 Re1 C21 C20 157.5(5) . . . . ? 
 C19 Re1 C21 C20 -38.9(4) . . . . ? 
 C17 Re1 C21 C20 -117.7(6) . . . . ? 
 C18 Re1 C21 C20 -80.6(5) . . . . ? 
 C16 Re1 C21 C17 148.4(5) . . . . ? 
 C1 Re1 C21 C17 -123.5(4) . . . . ? 
 C15 Re1 C21 C17 0.8(7) . . . . ? 
 C2 Re1 C21 C17 -84.8(4) . . . . ? 
 C20 Re1 C21 C17 117.7(6) . . . . ? 
 C19 Re1 C21 C17 78.7(4) . . . . ? 
 C18 Re1 C21 C17 37.1(4) . . . . ? 
 C16 Re1 C21 C26 -89.2(7) . . . . ? 
 C1 Re1 C21 C26 -1.2(7) . . . . ? 
 C15 Re1 C21 C26 123.1(7) . . . . ? 
 C2 Re1 C21 C26 37.6(7) . . . . ? 
 C20 Re1 C21 C26 -119.9(8) . . . . ? 
 C19 Re1 C21 C26 -158.9(7) . . . . ? 
 C17 Re1 C21 C26 122.4(8) . . . . ? 
 C18 Re1 C21 C26 159.5(7) . . . . ? 
 
_refine_diff_density_max    1.887 
_refine_diff_density_min   -3.030 
_refine_diff_density_rms    0.142 
